# Supplementary material
Source: Springer Nature journal article supplement (https://www.springermedizin.de/resource/supplementary/12971_2010_96_MOESM4_ESM.pdf/9595394)

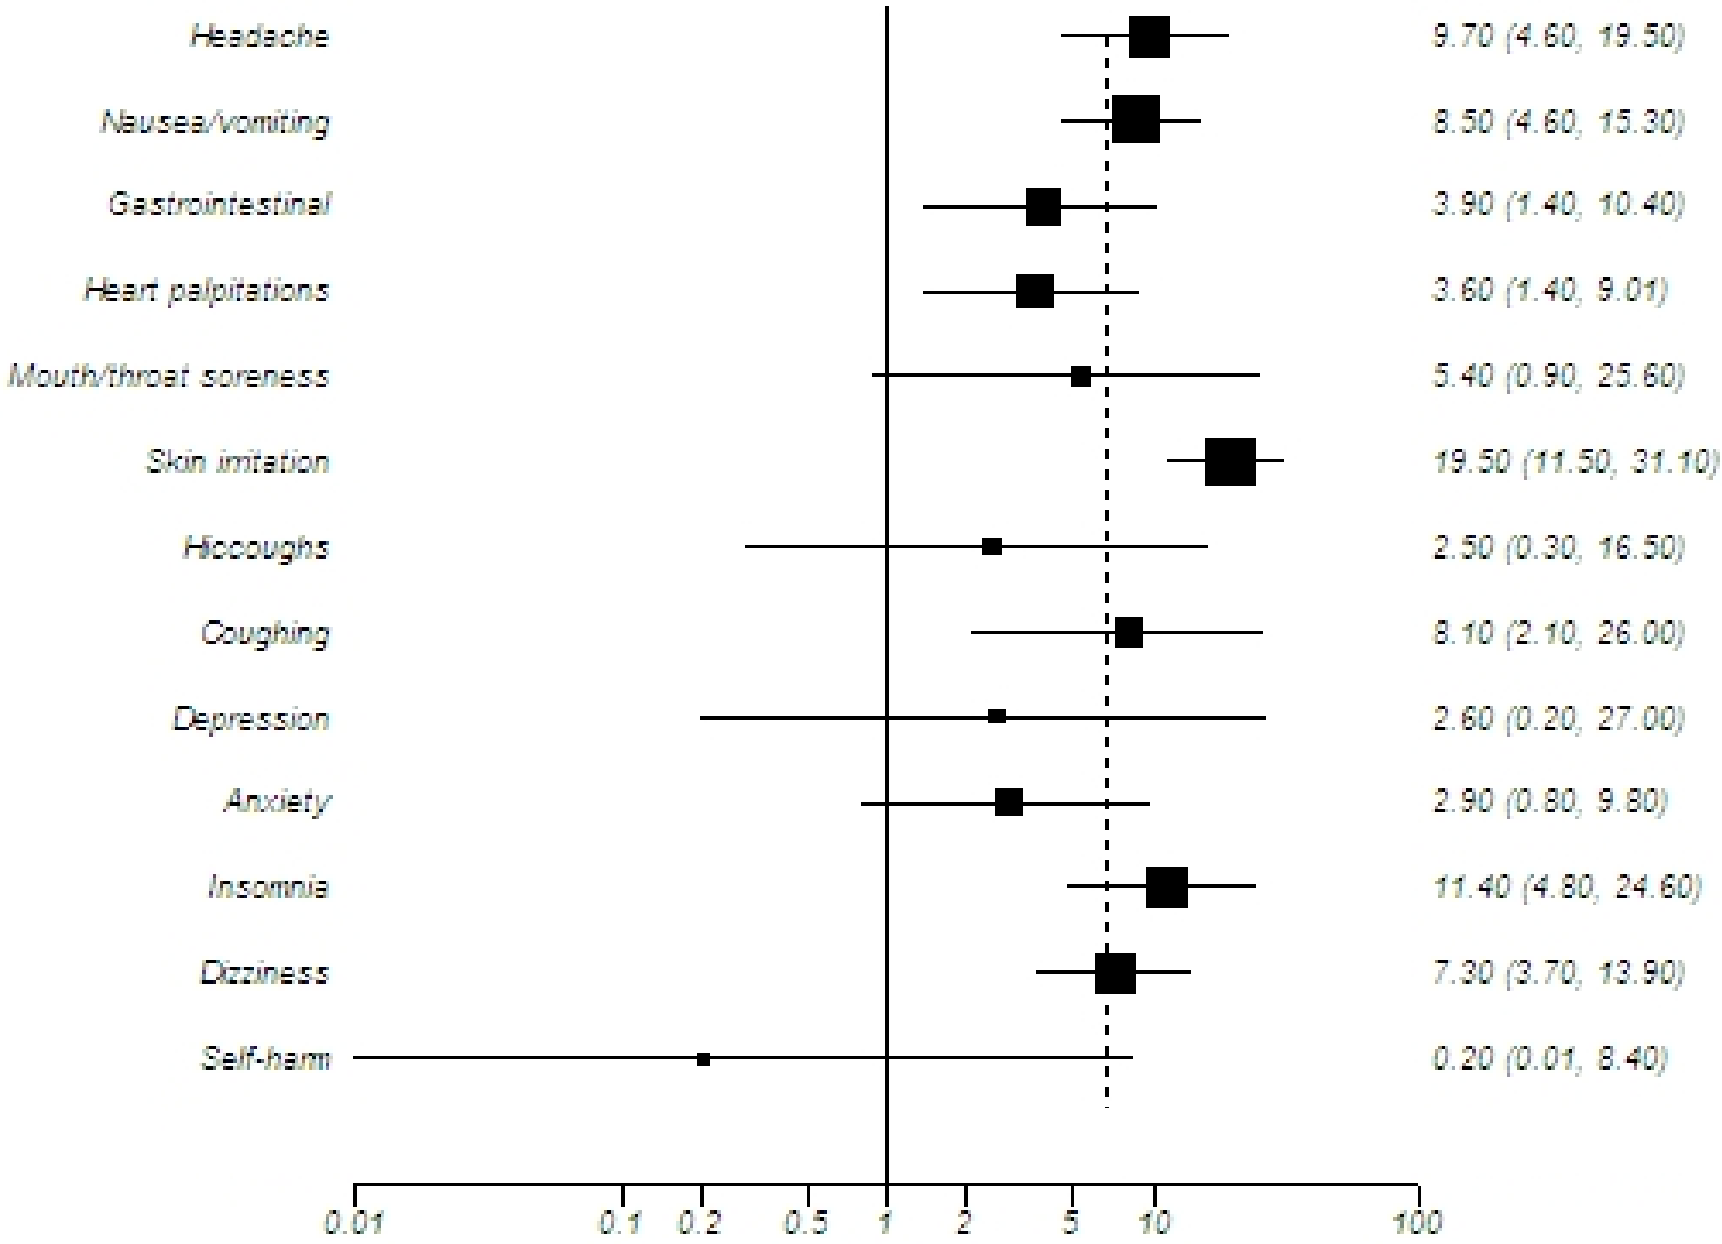

\* ratio (95% confidence interval)

Supplement: MOESM4 [file 9595394]
